# Supplementary material for: Disparities in Unmet Need for Mental Health Services in the United States, 1997–2010
Source: Atypon-hosted journal article supplement (doi:10.1176/appi.ps.201200071), 2013-01-01

**Figure 1.** US population prevalence of unmet need for mental health services due to cost, 1997-2010

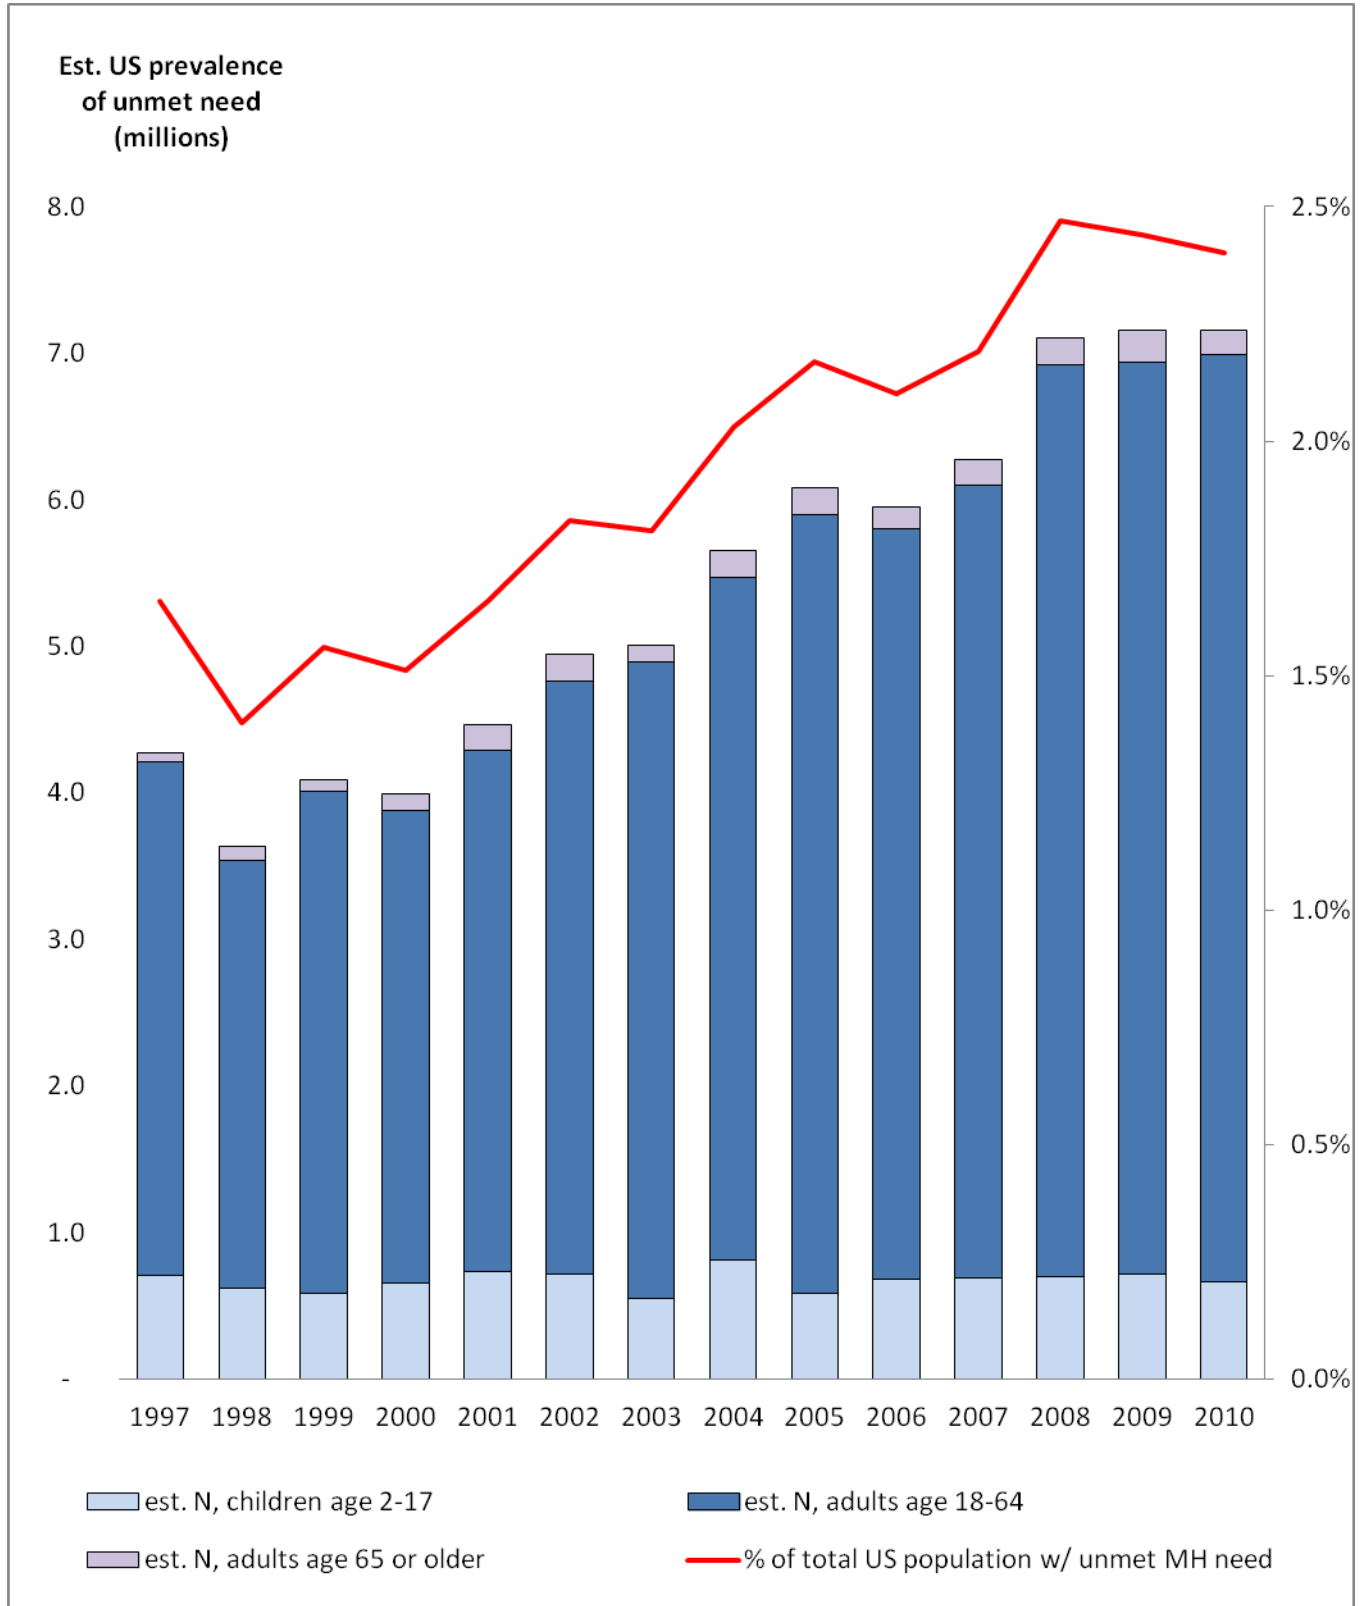

**Figure 2.** Relative rates of unmet need for mental health services due to cost by health insurance status, 1997-2010

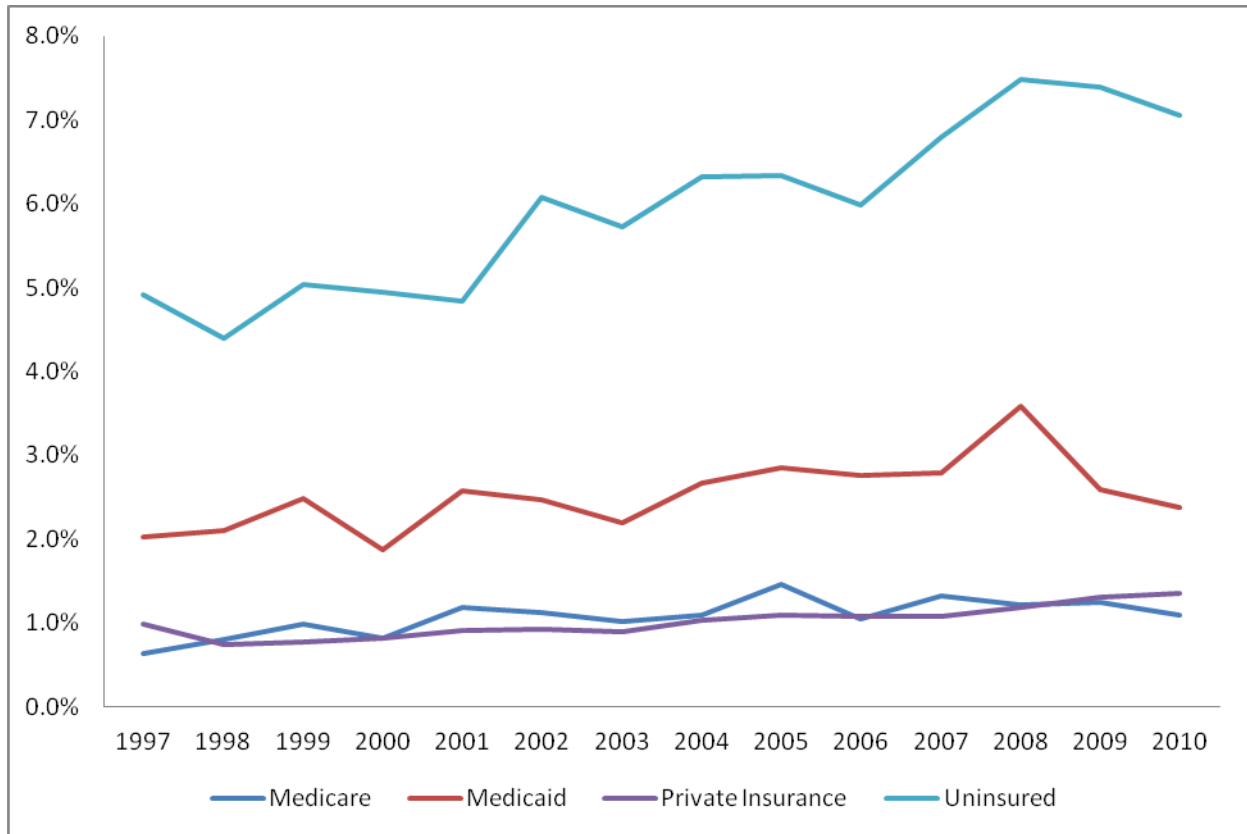

Supplement: 80_ds001.pdf [file 80_ds001.pdf]
